# Supplementary material for: Successful Cryopreservation of Spermatogonia Stem Cells of Neotropical Catfish (Rhamdia quelen) and Enriched Germ Cell Transplantation into Common Carp (Cyprinus carpio) Testes
Source: MDPI journal article supplement (doi:10.3390/fishes8100478), 2023-09-25
Supplement: s1 [file s1]

Supplementary Materials

# Successful Cryopreservation of Spermatogonia Stem Cells of Neotropical Catfish (*Rhamdia quelen*) and Enriched Germ Cell Transplantation into Common Carp (*Cyprinus carpio*) Testes

Ivana F. Rosa <sup>1,†</sup>, Emanuel R. M. Martinez <sup>1,†</sup>, Melanie Digmayer <sup>1</sup>, Lucas B. Doretto <sup>1,2,3,\*</sup> and Rafael H. Nóbrega <sup>1,\*</sup>

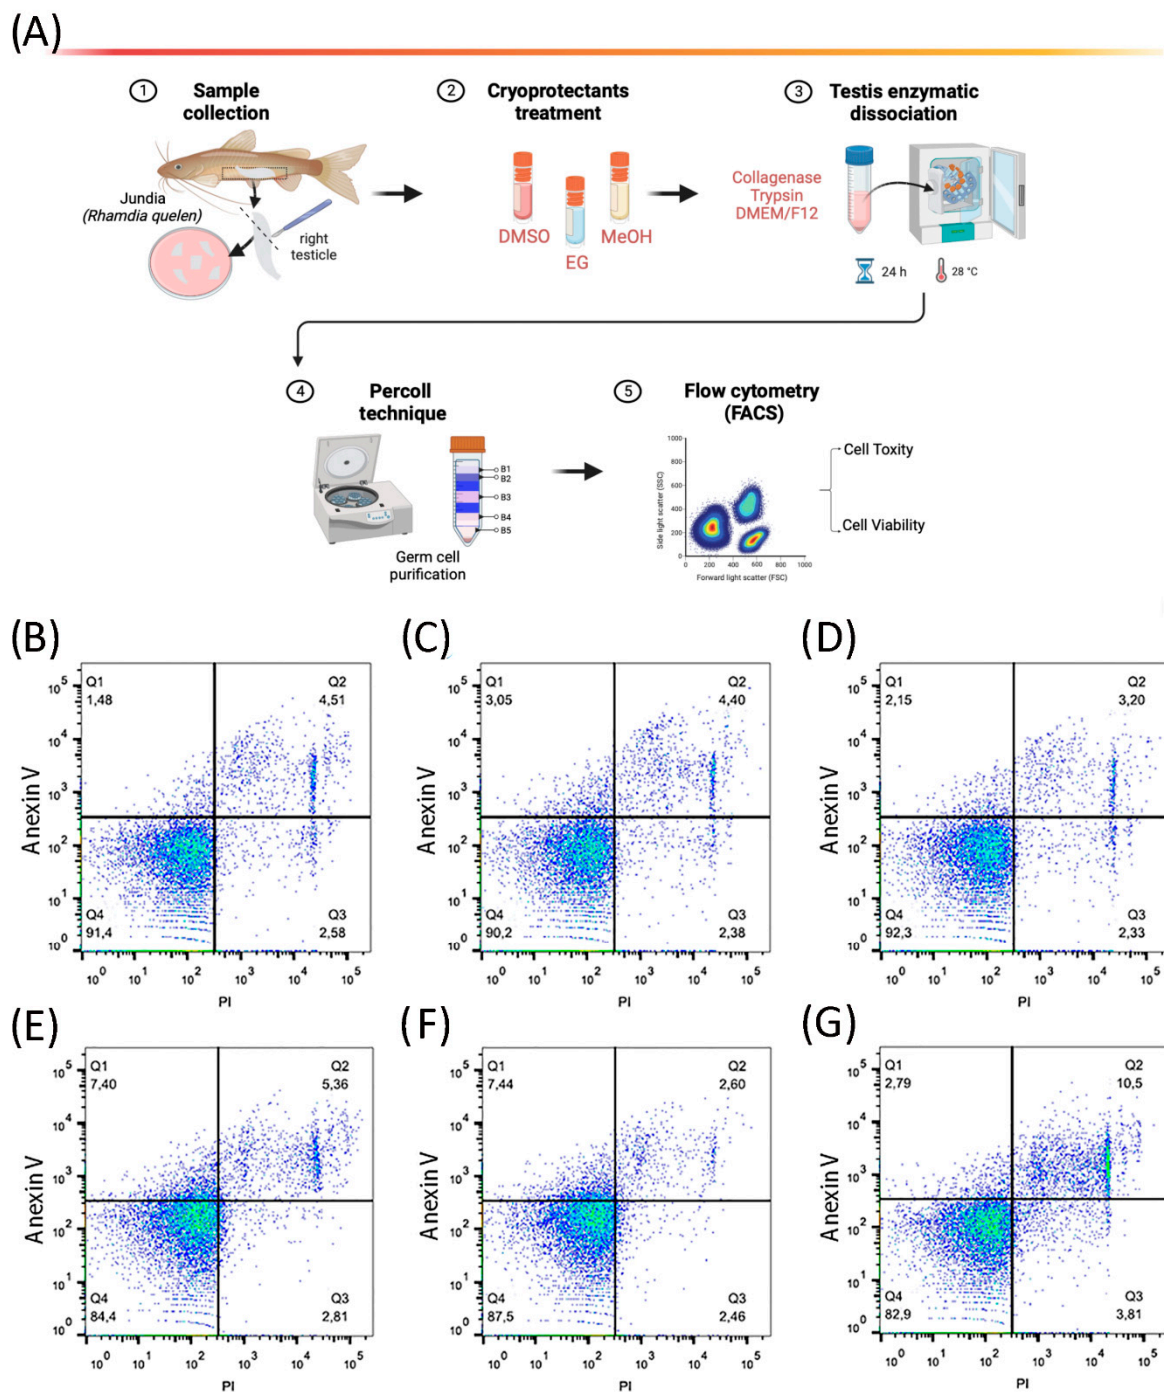

**Figure S1.** (A) Histograms of the cell viability analysis used to measure the toxicity of the cryoprotectants before freezing. (B) Cryoprotectant solution with DMSO for dissociated testes. (C) Cryoprotectant solution with MeOH for dissociated testes. (D) Cryoprotectant solution with EG for dissociated testes. (E) Cryoprotectant solution with DMSO for band 3. (F) Cryoprotectant solution with MeOH for band 3. (G) Cryoprotectant solution with EG for band 3. Dimethyl sulfoxide (DMSO), methanol (MeOH), ethylene glycol (EG), annexin V, and propidium iodide (PI). Quadrants: Q1: cells in initial apoptosis; Q2: cells in late apoptosis; Q3: cells in necrosis; Q4: living cells.

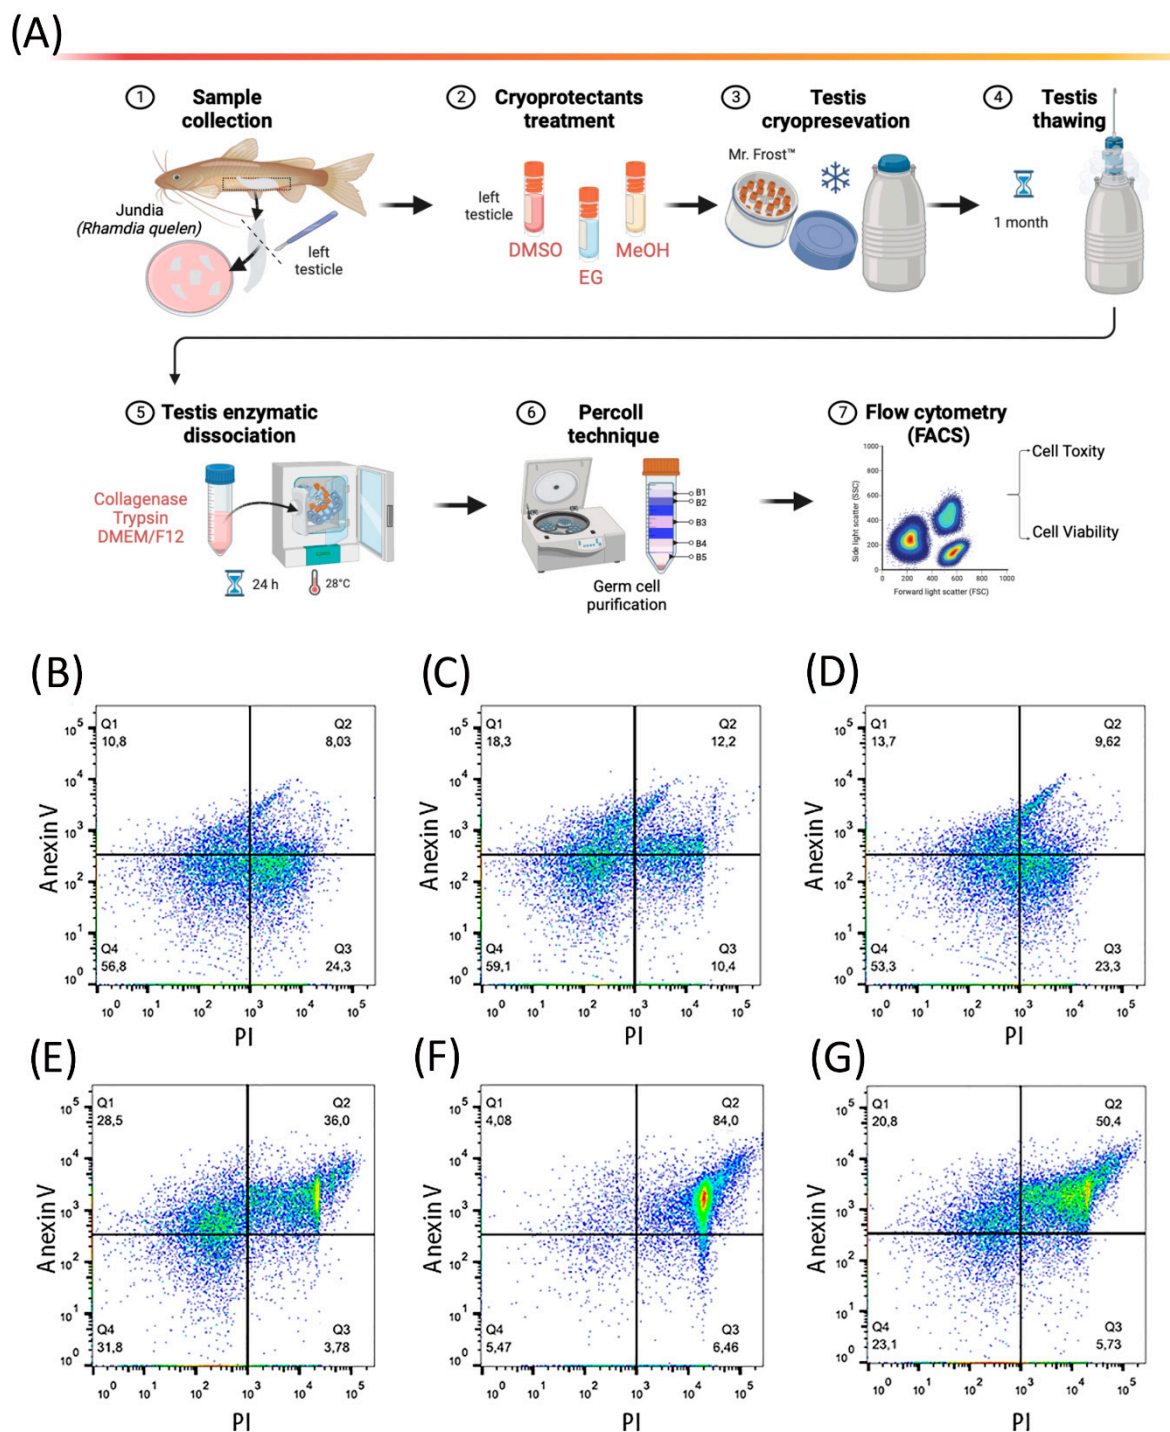

**Figure S2.** (A) Histograms of cell viability after thawing. (B) Cryoprotectant solution with DMSO for dissociated testes. (C) Cryoprotectant solution with MeOH for dissociated testes. (D) Cryoprotectant solution with EG for dissociated testes. (E) Cryoprotectant solution with DMSO for band 3. (F) Cryoprotectant solution with MeOH for band 3. (G) Cryoprotectant solution with EG for band 3. Dimethyl sulfoxide (DMSO), methanol (MeOH), ethylene glycol (EG), annexin V, and propidium iodide (PI). Quadrants: Q1: cells in initial apoptosis; Q2: cells in late apoptosis; Q3: cells in necrosis; Q4: living cells.

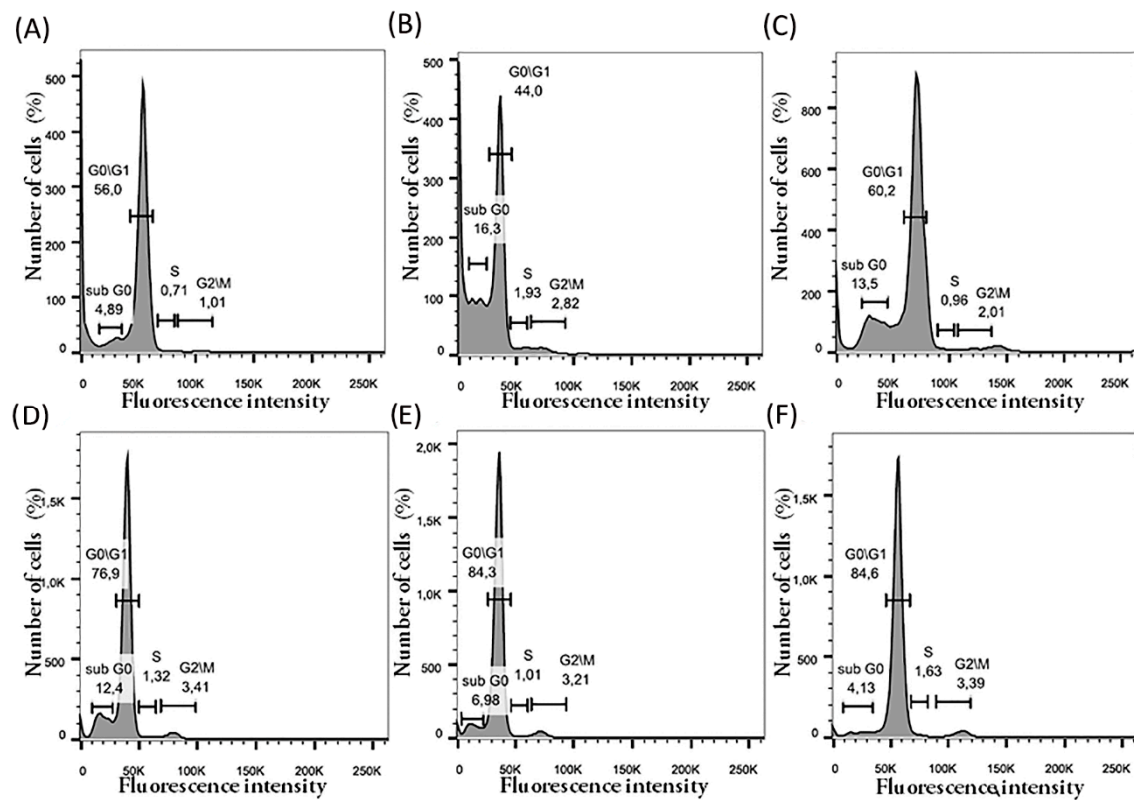

**Figure S3.** Flow cytometry analysis using propidium iodide to delineate cell cycle phases and distribution of cells from cell suspension poll of 3 animals. (A) Cell suspension (CS). (B) Band 1 (B1). (C) Band 2 (B2). (D) Band 3. (E) Band 4. (F) Band 5..



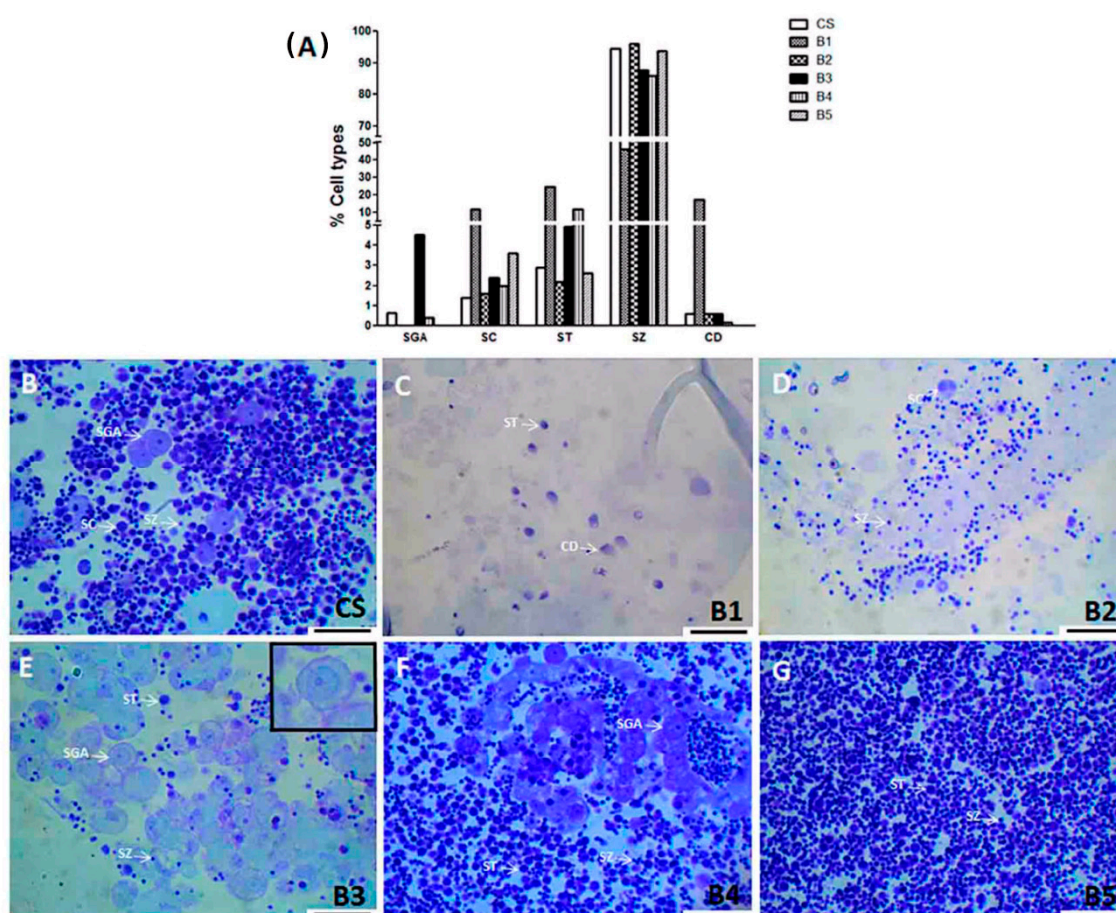

**Figure S4.** Characterization of germ cell types in percoll gradient and histological sections. (A) Percentage of germ cell types in the cell suspension (CS) and different Percoll bands (B1: Band 1; B2: Band 2; B3: Band 3; B4: Band 4; and B5: Band 5). Type A undifferentiated spermatogonia (SGA); spermatocytes (SC); spermatids (ST); spermatozoa (SZ) and cell debris (CD). (B–G) Histological section stained with toluidine blue. Type A undifferentiated spermatogonia (SGA); spermatocytes (SC); spermatids (ST); spermatozoa (SZ) and cell debris (CD). Inset in Figure E shows a higher magnification of type A undifferentiated spermatogonia in band 3. Scale bars: 25 µm.

**Table S1.** Groups for cellular toxicity and cell viability.

| Groups |                                                      |
|--------|------------------------------------------------------|
| 1      | Non-cryopreserved testicular cells from whole testes |
| 2      | Cryopreserved testicular cells from whole testes     |
| 3      | Non-cryopreserved enriched testicular cells (Band 3) |
| 4      | Cryopreserved enriched testicular cells (Band 3)     |

**Table S2.** Spermatogenesis depletion process performed on recipient common carp specimens.

| Week | °C/Dose                     |
|------|-----------------------------|
| 0    | 35°C (starting temperature) |
| 2    | 1st dose of busulfan        |
| 4    | 2nd dose of busulfan        |
| 6    | Germ cell transplant        |

**Table S3.** Collection period and the number of carp specimens for histological analysis after transplantation of jundiá spermatogonial cells.

| Collection Period | Number of Animals |
|-------------------|-------------------|
| 24 h              | 3                 |
| 1 week            | 2                 |
| 2 weeks           | 3                 |
| 3 weeks           | 2                 |
| 4 weeks           | 2                 |
| 5 weeks           | 2                 |
| 6 weeks           | 2                 |
| 12 weeks          | 2                 |
